# Supplementary material for: Detection of uric acid based on doped ZnO/Ag2O/Co3O4nanoparticle loaded glassy carbon electrode
Source: Royal Society of Chemistry journal article supplement (doi:10.1039/c9nj01287g), 2019-01-01
Supplement: c9nj01287g1.pdf [file c9nj01287g1.pdf]

### Supporting information:

#### **TGA analysis of ZnO/Ag<sub>2</sub>O/Co<sub>3</sub>O<sub>4</sub> nanoparticles:**

It has been measured and presented here the thermogravimetric study of prepared sample. Figure S1 shows the thermogravimetric analysis (TGA) of the as-synthesized ZnO/Ag<sub>2</sub>O/Co<sub>3</sub>O<sub>4</sub> nanoparticles. In case of the as-prepared ZnO/Ag<sub>2</sub>O/Co<sub>3</sub>O<sub>4</sub> NPs, high rate of mass loss has occurred in the temperature range due to the evaporation of the water absorbed on the surface of the products. At higher temperatures, weight loss continues up to 400°C, which is not the case for the calcined ZnO/Ag<sub>2</sub>O/Co<sub>3</sub>O<sub>4</sub> NPs. In the latter specimens, the mass loss ends at about 400°C which is due to the decomposition of Ag(OH), Co(OH)<sub>3</sub>, Zn(OH)<sub>2</sub>. From the TGA curves, shown in Figure S1, indicates the quality improvement of the ZnO/Ag<sub>2</sub>O/Co<sub>3</sub>O<sub>4</sub> NPs after calcination process at 400°C.

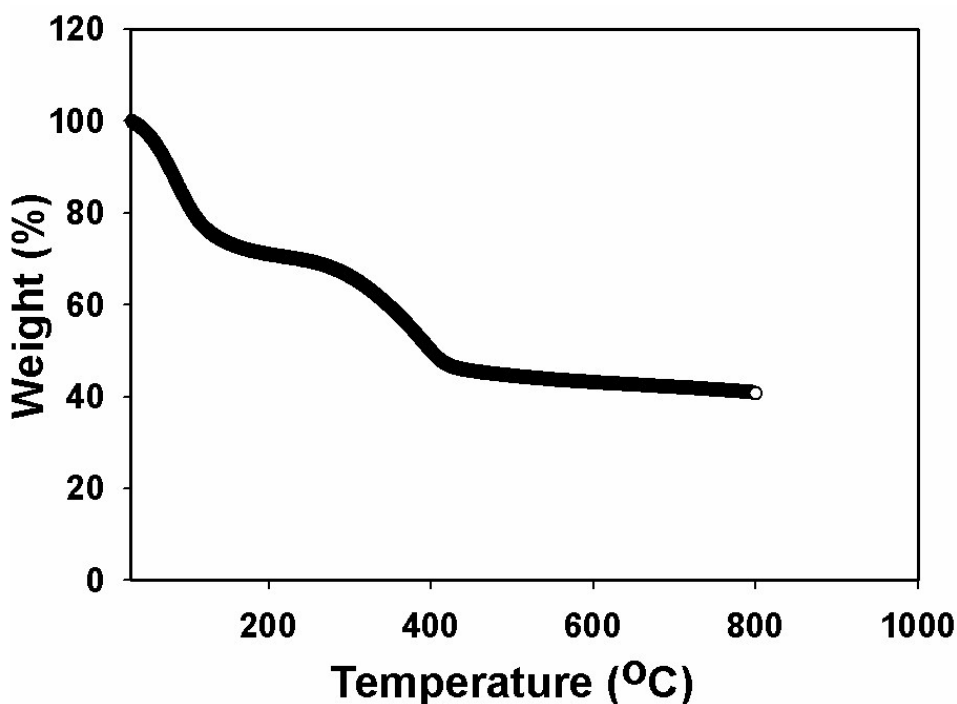

**Fig. S1.** The thermogravimetric analysis (TGA) of as prepared ZnO/Ag<sub>2</sub>O/Co<sub>3</sub>O<sub>4</sub> nanoparticles.
